# Supplementary material for: Novel Insight into the Formation of Odour—Active Compounds in Sea Buckthorn Wine and Distilled Liquor Based on GC–MS and E–Nose Analysis
Source: MDPI journal article supplement (doi:10.3390/foods11203273), 2022-10-20
Supplement: s1 [file s1]

**Table S1.** Concentration, *p* and VIP of VOCs of SJ, SW and DL.

| No.  | Compound                                    | Juice        | Wine         | Distillate   | <i>p</i> | VIP   |
|------|---------------------------------------------|--------------|--------------|--------------|----------|-------|
| al1  | 2-Butanol                                   | 0.1243±0.019 | 0.101 ±0.015 | 0.074 ±0.012 | 0.521    | 0.283 |
| al2  | 2-methyl-Propanol                           | --           | 0.095 ±0.011 | 0.115 ±0.015 | 0.316    | 0.418 |
| al3  | 3-methyl-Butanol                            | 0.137±0.137  | --           | 1.463 ±0.193 | 0.150    | 2.363 |
| al4  | 1-Hexanol                                   | 0.033±0.018  | 0.012 ±0.002 | 0.004 ±0.001 | 0.004    | 0.204 |
| al5  | 3-ethoxy-1-Propanol                         | --           | 0.024 ±0.000 | 0.030 ±0.002 | 0.047    | 0.192 |
| al6  | 1-Heptanol                                  | --           | 0.012 ±0.002 | 0.019 ±0.004 | 0.322    | 0.155 |
| al7  | Linalool                                    | 0.082±0.029  | 0.040 ±0.012 | 0.333 ±0.013 | 0.790    | 1.141 |
| al8  | [S-(R*,R*)]-2,3-Butanediol                  | --           | 0.259 ±0.145 | --           | 0.129    | 1.308 |
| al9  | 1-Octanol                                   | 0.098±0.050  | 0.026 ±0.002 | 0.070 ±0.008 | 0.001    | 0.542 |
| al10 | [R-(R*,R*)]-2,3-Butanediol                  | 0.004±0.001  | 0.085 ±0.015 | --           | 0.131    | 0.699 |
| al11 | Terpinen-4-ol                               | 0.053±0.004  | 0.020 ±0.000 | 0.038 ±0.006 | 0.000    | 0.311 |
| al12 | 1-Nonanol                                   | 0.120±0.072  | 0.067 ±0.005 | 0.306 ±0.042 | 0.123    | 1.044 |
| al13 | 2-Furanmethanol                             | 0.077±0.017  | 0.021 ±0.001 | --           | 0.000    | 0.318 |
| al14 | α-Terpineol                                 | --           | --           | 0.057 ±0.008 | 0.109    | 0.472 |
| al15 | Geraniol                                    | --           | --           | 0.014 ±0.005 | 0.119    | 0.249 |
| al16 | Benzyl alcohol                              | --           | 0.054 ±0.002 | --           | 0.022    | 0.643 |
| al17 | Phenylethyl Alcohol                         | 0.448±0.132  | 0.936 ±0.118 | --           | 0.154    | 2.415 |
| e1   | 3-methyl-Butanoic acid ethyl ester          | 0.129±0.006  | 0.387 ±0.018 | 0.067 ±0.007 | 0.227    | 1.528 |
| e2   | Pentanoic acid ethyl ester                  | 0.153±0.010  | 0.458 ±0.029 | 0.123 ±0.030 | 0.506    | 1.583 |
| e3   | 3-methyl-1-Butanol acetate                  | --           | --           | 0.118 ±0.022 | 0.132    | 0.678 |
| e4   | Butanoic acid, 1-methylpropyl ester         | 0.041±0.002  | 0.124 ±0.005 | --           | 0.046    | 0.921 |
| e5   | Pentanoic acid 1-methylpropyl ester         | 0.408±0.005  | 1.224 ±0.015 | 1.380 ±0.361 | 0.142    | 1.175 |
| e6   | 2-methyl-Butanoic acid 2-methylpropyl ester | 0.013±0.001  | 0.039 ±0.003 | 0.044 ±0.006 | 0.194    | 0.204 |
| e7   | Isobutyl isovalerate                        | 0.072±0.001  | 0.216 ±0.002 | 0.622 ±0.057 | 0.131    | 1.081 |
| e8   | 2-methyl-Propanoic acid 2-methylbutyl ester | 0.035±0.001  | 0.103 ±0.002 | 0.250 ±0.067 | 0.137    | 0.631 |
| e9   | Pentanoic acid 1-methylpropyl ester         | --           | --           | 0.659 ±0.049 | 0.131    | 1.690 |
| e10  | Hexanoic acid 1-methylethyl ester           | 0.033±0.001  | 0.099 ±0.003 | --           | 0.164    | 0.822 |
| e11  | Hexanoic acid ethyl ester                   | 0.103±0.001  | 0.309 ±0.003 | 0.335 ±0.005 | 0.134    | 0.749 |

|     |                                                 |             |              |              |       |       |
|-----|-------------------------------------------------|-------------|--------------|--------------|-------|-------|
| e12 | 2-methyl-Butanoic acid 2-methylbutyl ester      | 0.507±0.009 | 1.521 ±0.027 | 0.835 ±0.026 | 0.155 | 2.407 |
| e13 | 3-methyl-Butanoic acid 2-methylbutyl ester      | 2.297±0.017 | 6.889 ±0.050 | 4.477 ±1.012 | 0.145 | 4.635 |
| e14 | Heptanoic acid ethyl ester                      | 0.067±0.020 | 0.201 ±0.060 | 0.270 ±0.053 | 0.543 | 0.382 |
| e15 | Hexanoic acid 2-methylpropyl ester              | --          | --           | 0.030 ±0.004 | 0.132 | 0.339 |
| e16 | 3-methyl-Butanoic acid 3-methyl-3-butenyl ester | --          | --           | 0.035 ±0.006 | 0.101 | 0.372 |
| e17 | Octanoic acid methyl ester                      | 0.025±0.002 | 0.075 ±0.016 | 0.021 ±0.003 | 0.180 | 0.553 |
| e18 | n-Octanoic acid isopropyl ester                 | 0.056±0.016 | 0.168 ±0.078 | --           | 0.164 | 1.020 |
| e19 | Octanoic acid ethyl ester                       | 0.137±0.038 | 0.411 ±0.114 | 1.647 ±0.348 | 0.259 | 1.950 |
| e20 | 2-methyl-Propanoic acid heptyl ester            | 0.016±0.001 | 0.048 ±0.013 | --           | 0.164 | 0.529 |
| e21 | 3-methyl-Butanoic acid hexyl ester              | 0.040±0.019 | 0.120 ±0.057 | 0.036 ±0.010 | 0.240 | 0.731 |
| e22 | Hexanoic acid 2-methylbutyl ester               | 0.102±0.099 | 0.306 ±0.107 | 0.186 ±0.034 | 0.209 | 0.869 |
| e23 | (Z)-4-Octenoic acid ethyl ester                 | 0.041±0.022 | 0.124 ±0.065 | --           | 0.153 | 0.869 |
| e24 | Nonanoic acid, ethyl ester                      | 0.039±0.024 | 0.117 ±0.032 | 0.272 ±0.063 | 0.543 | 0.582 |
| e25 | 3-hydroxy-Butanoic acid ethyl ester             | 0.029±0.024 | 0.086 ±0.011 | --           | 0.155 | 0.698 |
| e26 | 2-Furancarboxylic acid 1-methylethyl ester      | 0.052±0.044 | 0.156 ±0.032 | --           | 0.164 | 0.938 |
| e27 | Decanoic acid ethyl ester                       | --          | --           | 1.233 ±0.336 | 0.132 | 2.171 |
| e28 | Benzoic acid 1-methylethyl ester                | 0.068±0.042 | 0.205 ±0.025 | 0.120 ±0.017 | 0.212 | 0.722 |
| e29 | Benzoic acid ethyl ester                        | 0.076±0.049 | 0.227 ±0.046 | 0.445 ±0.027 | 0.238 | 0.648 |
| e30 | 3-methyl-Butanoic acid 2-furanylmethyl ester    | 0.070±0.045 | 0.210 ±0.035 | 0.065 ±0.004 | 0.191 | 0.929 |
| e31 | 2-Furanecarboxylic acid 2-butyl ester           | 0.116±0.058 | 0.348 ±0.174 | 0.119 ±0.017 | 0.201 | 1.199 |
| e32 | Undecanoic acid ethyl ester                     | --          | --           | 0.035 ±0.004 | 0.132 | 0.368 |
| e33 | Benzoic acid 2-methylpropyl ester               | 0.153±0.146 | 0.458 ±0.037 | --           | 0.162 | 1.595 |
| e34 | Benzoic acid cyclohexyl ester                   | --          | --           | 1.006 ±0.151 | 0.130 | 1.987 |
| e35 | n-Propyl benzoate                               | 0.058±0.002 | 0.174 ±0.056 | 0.030 ±0.001 | 0.166 | 0.900 |
| e36 | Methyl salicylate                               | 0.028±0.026 | 0.083 ±0.017 | 0.029 ±0.004 | 0.173 | 0.552 |
| e37 | Benzeneacetic acid ethyl ester                  | 0.087±0.048 | 0.261 ±0.044 | 0.143 ±0.019 | 0.217 | 0.857 |
| e38 | Benzoic acid 2-methylpropyl ester               | 0.148±0.110 | 0.445 ±0.029 | 0.220 ±0.039 | 0.209 | 1.152 |
| e39 | Acetic acid 2-phenylethyl ester                 | 0.067±0.063 | 0.202 ±0.088 | 0.244 ±0.034 | 0.237 | 0.432 |
| e40 | Dodecanoic acid ethyl ester                     | --          | --           | 1.110 ±0.276 | 0.132 | 2.065 |

|     |                                            |             |              |              |       |       |
|-----|--------------------------------------------|-------------|--------------|--------------|-------|-------|
| e41 | 2-Furancarboxylic acid 3-methylbutyl ester | 0.065±0.002 | 0.195 ±0.086 | 0.045 ±0.018 | 0.201 | 0.919 |
| e42 | Hexanoic acid 2-phenylethyl ester          | 0.088±0.012 | 0.264 ±0.016 | --           | 0.164 | 1.224 |
| e43 | β-Phenylethyl butyrate                     | --          | --           | 0.105 ±0.008 | 0.132 | 0.640 |
| e44 | Benzenepropanoic acid ethyl ester          | --          | --           | 0.029 ±0.004 | 0.106 | 0.337 |
| e45 | 3-methyl-Butanoic acid phenylmethyl ester  | 0.107±0.088 | 0.321 ±0.064 | --           | 0.164 | 1.349 |
| e46 | Pentanoic acid phenylmethyl ester          | --          | --           | 0.254 ±0.044 | 0.132 | 0.996 |
| e47 | 3-methyl-Butanol benzoate                  | 0.099±0.060 | 0.296 ±0.079 | 1.315 ±0.205 | 0.515 | 1.780 |
| e48 | Ethyl tridecanoate                         | --          | --           | 0.031 ±0.008 | 0.109 | 0.361 |
| e49 | 3-methyl-Butanoic acid 2-phenylethyl ester | 0.103±0.094 | 0.310 ±0.081 | 0.236 ±0.044 | 0.227 | 0.751 |
| e50 | phenyl-Acetic acid isopentyl ester         | --          | --           | 0.024 ±0.003 | 0.072 | 0.310 |
| e51 | Methyl tetradecanoate                      | --          | --           | 0.021 ±0.008 | 0.132 | 0.280 |
| e52 | Tetradecanoic acid ethyl ester             | 0.072±0.009 | 0.216 ±0.007 | 0.795 ±0.155 | 0.528 | 1.268 |
| e53 | Isoamyl laurate                            | --          | --           | 0.020 ±0.005 | 0.095 | 0.290 |
| e54 | Ethyl 9-tetradecenoate                     | --          | --           | 0.050 ±0.011 | 0.132 | 0.440 |
| e55 | 3-phenyl-2-Propenoic acid ethyl ester      | --          | --           | 0.021 ±0.009 | 0.132 | 0.279 |
| e56 | Pentadecanoic acid ethyl ester             | --          | --           | 0.043 ±0.012 | 0.132 | 0.405 |
| e57 | Hexadecanoic acid methyl ester             | --          | --           | 0.038 ±0.004 | 0.086 | 0.387 |
| e58 | 9-Hexadecenoic acid methyl ester           | --          | --           | 0.044 ±0.006 | 0.132 | 0.411 |
| e59 | Hexadecanoic acid ethyl ester              | 0.075±0.014 | 0.225 ±0.022 | 1.145 ±0.230 | 0.534 | 1.690 |
| e60 | Hexadecanoic acid propyl ester             | --          | --           | 0.015 ±0.002 | 0.047 | 0.241 |
| e61 | Ethyl 9,12-hexadecadienoate                | --          | --           | 0.039 ±0.007 | 0.106 | 0.389 |
| e62 | Ethyl Oleate                               | --          | --           | 0.058 ±0.017 | 0.132 | 0.461 |
| e63 | Linoleic acid ethyl ester                  | --          | --           | 0.049 ±0.006 | 0.132 | 0.440 |
| ac1 | Acetic acid                                | 0.260±0.109 | 0.176 ±0.045 | --           | 0.002 | 0.756 |
| ac2 | 2-methyl-Propanoic acid                    | --          | --           | 0.080 ±0.022 | 0.132 | 0.553 |
| ac3 | 3-methyl-Butanoic acid                     | 0.047±0.017 | 0.057 ±0.003 | 0.174 ±0.050 | 0.198 | 0.593 |
| ac4 | Hexanoic acid                              | 0.088±0.024 | 0.021 ±0.002 | 0.035 ±0.008 | 0.000 | 0.375 |
| ac5 | Octanoic acid                              | 0.163±0.160 | 0.037 ±0.006 | 0.056 ±0.013 | 0.000 | 0.502 |
| ac6 | Oxalacetic acid                            | 0.124±0.019 | --           | --           | 0.111 | 0.478 |
| ac7 | Nonanoic acid                              | --          | --           | 0.019 ±0.005 | 0.132 | 0.270 |
| ac8 | n-Decanoic acid                            | 0.123±0.024 | --           | --           | 0.127 | 0.475 |
| ac9 | Dodecanoic acid                            | --          | --           | 0.042 ±0.002 | 0.047 | 0.409 |

|      |                                                          |             |              |              |       |       |
|------|----------------------------------------------------------|-------------|--------------|--------------|-------|-------|
| ac10 | Benzoic acid                                             | 0.091±0.056 | --           | --           | 0.020 | 0.424 |
| ac11 | n-Hexadecanoic acid                                      | --          | 0.041 ±0.016 | 0.091 ±0.013 | 0.304 | 0.449 |
| c1   | Hexanal                                                  | --          | --           | 0.002 ±0.000 | 0.132 | 0.083 |
| c2   | 4-methylene-5-Hexenal                                    | --          | --           | 0.012 ±0.003 | 0.132 | 0.215 |
| c3   | 3-Octanone                                               | 0.011±0.002 | 0.034 ±0.005 | 0.013 ±0.001 | 0.000 | 0.402 |
| c4   | Heptanal                                                 | 0.005±0.001 | 0.015 ±0.002 | --           | 0.138 | 0.292 |
| c5   | 6-methyl-5-Hepten-2-one                                  | 0.176±0.061 | 0.527 ±0.182 | 0.043 ±0.004 | 0.143 | 1.838 |
| c6   | Nonanal                                                  | 0.088±0.035 | 0.264 ±0.105 | 0.052 ±0.012 | 0.401 | 1.178 |
| c7   | 1-(1H-pyrazol-4-yl)-Ethanone                             | 0.097±0.014 | 0.291 ±0.022 | --           | 0.138 | 1.292 |
| c8   | Furfural                                                 | 0.034±0.003 | 0.102 ±0.009 | 0.444 ±0.090 | 0.475 | 1.009 |
| c9   | Benzaldehyde                                             | 0.086±0.036 | 0.257 ±0.017 | 0.077 ±0.013 | 0.427 | 1.053 |
| c10  | 5-methyl-2-Furancarboxaldehyde                           | 0.053±0.011 | 0.159 ±0.053 | 0.015 ±0.001 | 0.141 | 0.895 |
| c11  | 4-dimethyl-3-Cyclohexene-1-acetaldehyde                  | --          | --           | 0.045 ±0.007 | 0.079 | 0.420 |
| c12  | 2-Tridecanone                                            | --          | --           | 0.021 ±0.003 | 0.038 | 0.290 |
| c13  | Tetradecanal                                             | 0.097±0.009 | 0.284 ±0.069 | --           | 0.136 | 1.256 |
| c14  | 6,10-dimethyl-5,9-Undecadien-2-one                       | 0.056±0.013 | 0.169 ±0.058 | --           | 0.135 | 0.970 |
| c15  | 1-(2,6,6-trimethyl-1,3-cyclohexadien-1-yl)-2-Buten-1-one | --          | --           | 0.133 ±0.029 | 0.074 | 0.717 |
| c16  | Pentadecanal                                             | --          | --           | 0.023 ±0.006 | 0.079 | 0.297 |
| c17  | 1-(4-Methoxymethyl-2,6-dimethylphenyl)ethanone           | --          | --           | 0.024 ±0.006 | 0.057 | 0.302 |
| c18  | Hexadecanal                                              | --          | --           | 0.023 ±0.005 | 0.079 | 0.298 |
| c19  | 2,3-dihydro-3,5-dihydroxy-6-methyl-4H-Pyran-4-one        | 0.087±0.088 | 0.262 ±0.063 | --           | 0.136 | 1.202 |
| c20  | 5-Hydroxymethylfurfural                                  | 0.499±0.093 | 1.499 ±0.278 | --           | 0.138 | 2.879 |
| alk1 | 3,7-dimethyl-1,3,7-Octatriene                            | 0.001±0.000 | --           | --           | 0.022 | 0.049 |
| alk2 | 1,1-dimethyl-Cyclopropane                                | --          | 0.495 ±0.084 | --           | 0.079 | 1.702 |
| alk3 | Tridecane                                                | 0.041±0.001 | --           | --           | 0.079 | 0.288 |
| alk4 | Styrene                                                  | --          | 0.015 ±0.001 | --           | 0.079 | 0.341 |
| alk5 | 3-ethyl-Tridecane                                        | --          | 0.008 ±0.001 | --           | 0.047 | 0.256 |
| alk6 | Tetradecane                                              | 0.024±0.017 | 0.001 ±0.000 | 0.013 ±0.003 | 0.233 | 0.280 |
| alk7 | 5-Tetradecene                                            | 0.026±0.002 | --           | --           | 0.079 | 0.223 |
| alk8 | 3,5-dimethyl-Cyclohexene                                 | --          | --           | 0.022 ±0.005 | 0.079 | 0.291 |

|       |                                                                    |             |              |              |       |       |
|-------|--------------------------------------------------------------------|-------------|--------------|--------------|-------|-------|
| alk9  | Pentadecane                                                        | 0.039±0.005 | 0.003 ±0.001 | --           | 0.091 | 0.263 |
| alk10 | 4-methylene-1-(1-methylethyl)-Cyclohexene                          | --          | 0.011 ±0.002 | --           | 0.000 | 0.293 |
| alk11 | nonyl-Cyclopropane                                                 | --          | --           | 0.020 ±0.008 | 0.062 | 0.276 |
| t1    | β-copaene                                                          | 0.037±0.003 | --           | --           | 0.074 | 0.264 |
| t2    | Germacrene D                                                       | --          | 0.019 ±0.001 | 0.030 ±0.002 | 0.085 | 0.226 |
| t3    | α-Muurolene                                                        | 0.027±0.002 | --           | --           | 0.079 | 0.227 |
| t4    | α-Farnesene                                                        | --          | --           | 0.021 ±0.005 | 0.079 | 0.277 |
| t5    | Selina-3,7(11)-diene                                               | --          | --           | 0.009 ±0.010 | 0.065 | 0.179 |
| t6    | Dispiro [4.2.4.2]tetradeca-6,13-diene                              | --          | --           | 0.007 ±0.001 | 0.060 | 0.151 |
| t7    | Cadina-1(10),6,8-triene                                            | --          | --           | 0.021 ±0.004 | 0.079 | 0.268 |
| t8    | α-Copaene                                                          | --          | --           | 0.005 ±0.001 | 0.079 | 0.131 |
| o1    | 2-methoxy-Phenol                                                   | 0.066±0.006 | 0.197 ±0.079 | --           | 0.135 | 1.049 |
| o2    | Phenol                                                             | 0.071±0.006 | 0.213 ±0.010 | --           | 0.138 | 1.085 |
| o3    | 4-ethyl-Phenol                                                     | 0.085±0.012 | 0.254 ±0.045 | --           | 0.136 | 1.187 |
| o4    | 2-Methoxy-4-vinylphenol                                            | --          | --           | 0.017 ±0.003 | 0.079 | 0.258 |
| o5    | 2,4-Di-tert-butylphenol                                            | --          | --           | 0.037 ±0.005 | 0.053 | 0.384 |
| o6    | trans-Isoeugenol                                                   | --          | --           | 0.025 ±0.002 | 0.079 | 0.315 |
| o7    | 2-methoxy-4-(1-propenyl)-Phenol                                    | 0.119±0.117 | 0.359 ±0.050 | --           | 0.137 | 1.410 |
| o8    | Acetoin                                                            | 0.080±0.029 | 0.240 ±0.087 | --           | 0.138 | 1.237 |
| o9    | (2S,4R)-4-Methyl-2-(2-methylprop-1-en-1-yl)tetrahy<br>dro-2H-pyran | --          | --           | 0.042 ±0.005 | 0.053 | 0.406 |
| o10   | 1-ethenyl-4-methoxy-Benzene                                        | --          | --           | 0.030 ±0.006 | 0.057 | 0.344 |
| o11   | 2,3-dihydro-1,1,5,6-tetramethyl-1H-Indene                          | --          | --           | 0.020 ±0.002 | 0.079 | 0.261 |
| o12   | (+)-Borneol                                                        | --          | --           | 0.092 ±0.018 | 0.079 | 0.584 |
| o13   | methoxy-phenyl-Oxime                                               | 0.114±0.076 | 0.341 ±0.027 | 0.081 ±0.018 | 0.165 | 1.235 |
| o14   | 1, 1, 5-Trimethyl-1, 2-dihydronaphthalene                          | --          | --           | 0.008 ±0.001 | 0.004 | 0.177 |
| o15   | 2,3-dihydro-Benzofuran                                             | --          | --           | 0.021 ±0.002 | 0.022 | 0.295 |

Note: VIP (Variable important in Projection) was the variable weight value of the (O)PLS-DA model variables (SIMCA-P software), which can be used to measure the im-pact of different metabolite accumulation differences on the classification and discrimination of each group of samples and the explanatory power. VIP ≥ 1 was common screening criterion for different metabolites.

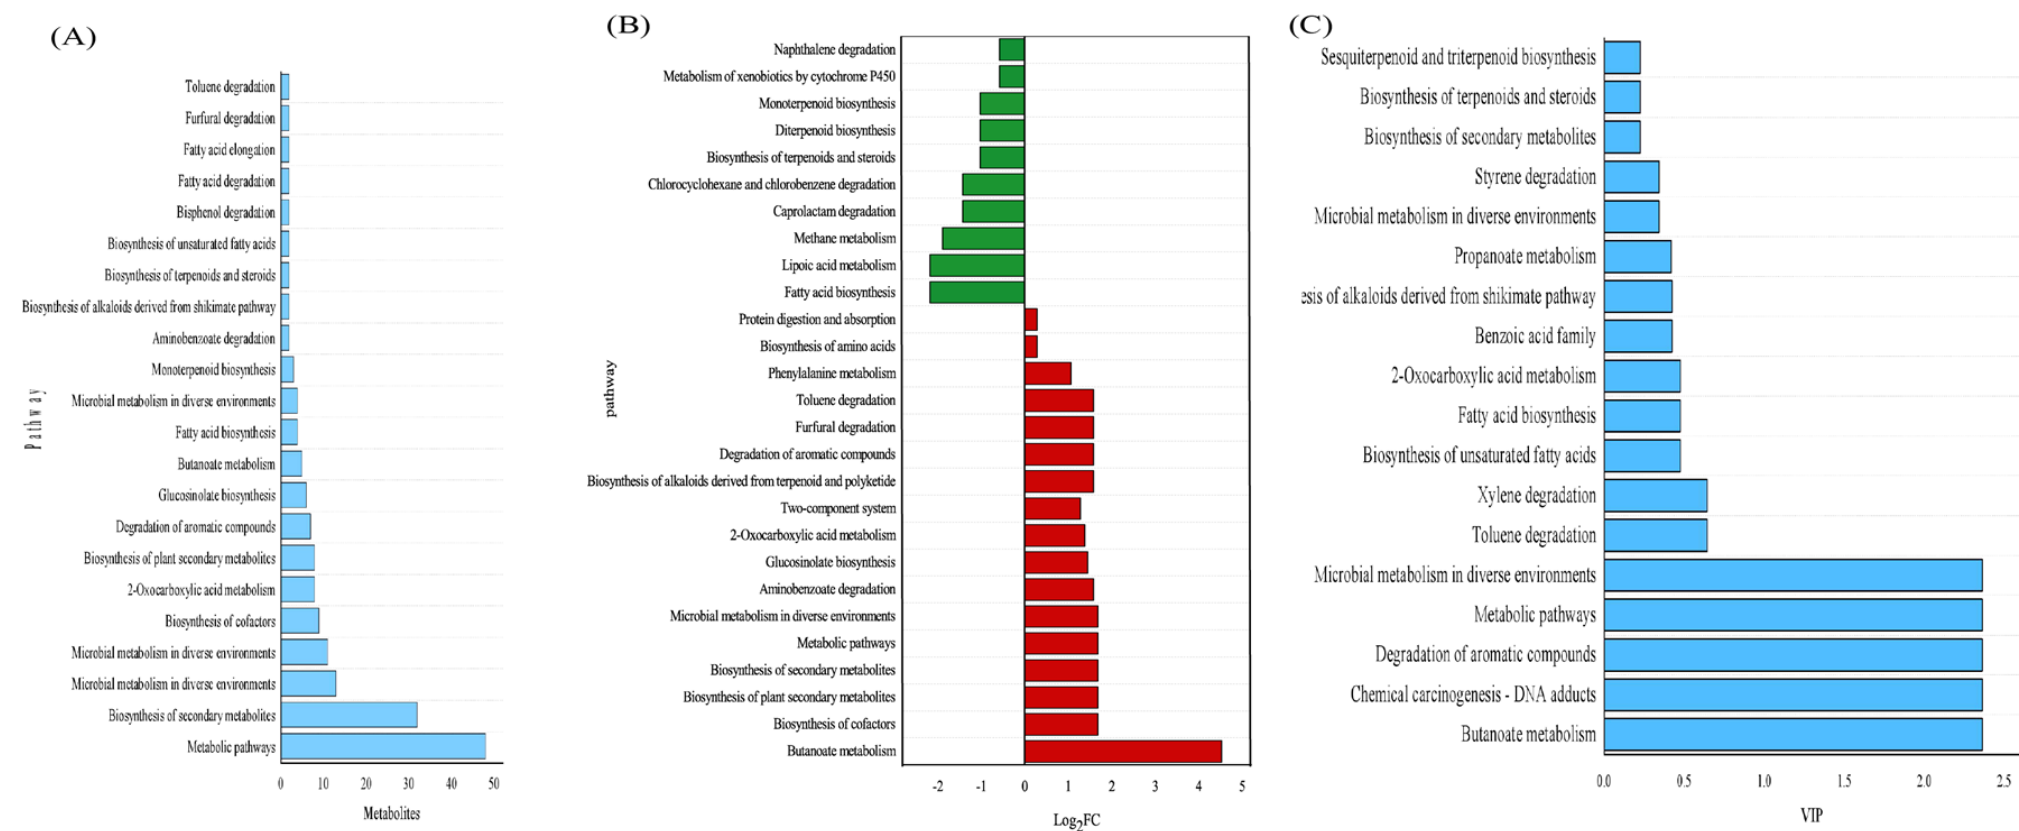

**Figure S1.** Comparison of pathways in SJ and SW by GC-MS (n = 3). (A) Main pathways by metabolites annotation, Log<sub>2</sub>FC (B) and VIP (C) for differential pathways after fermentation.

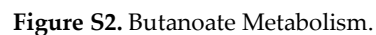

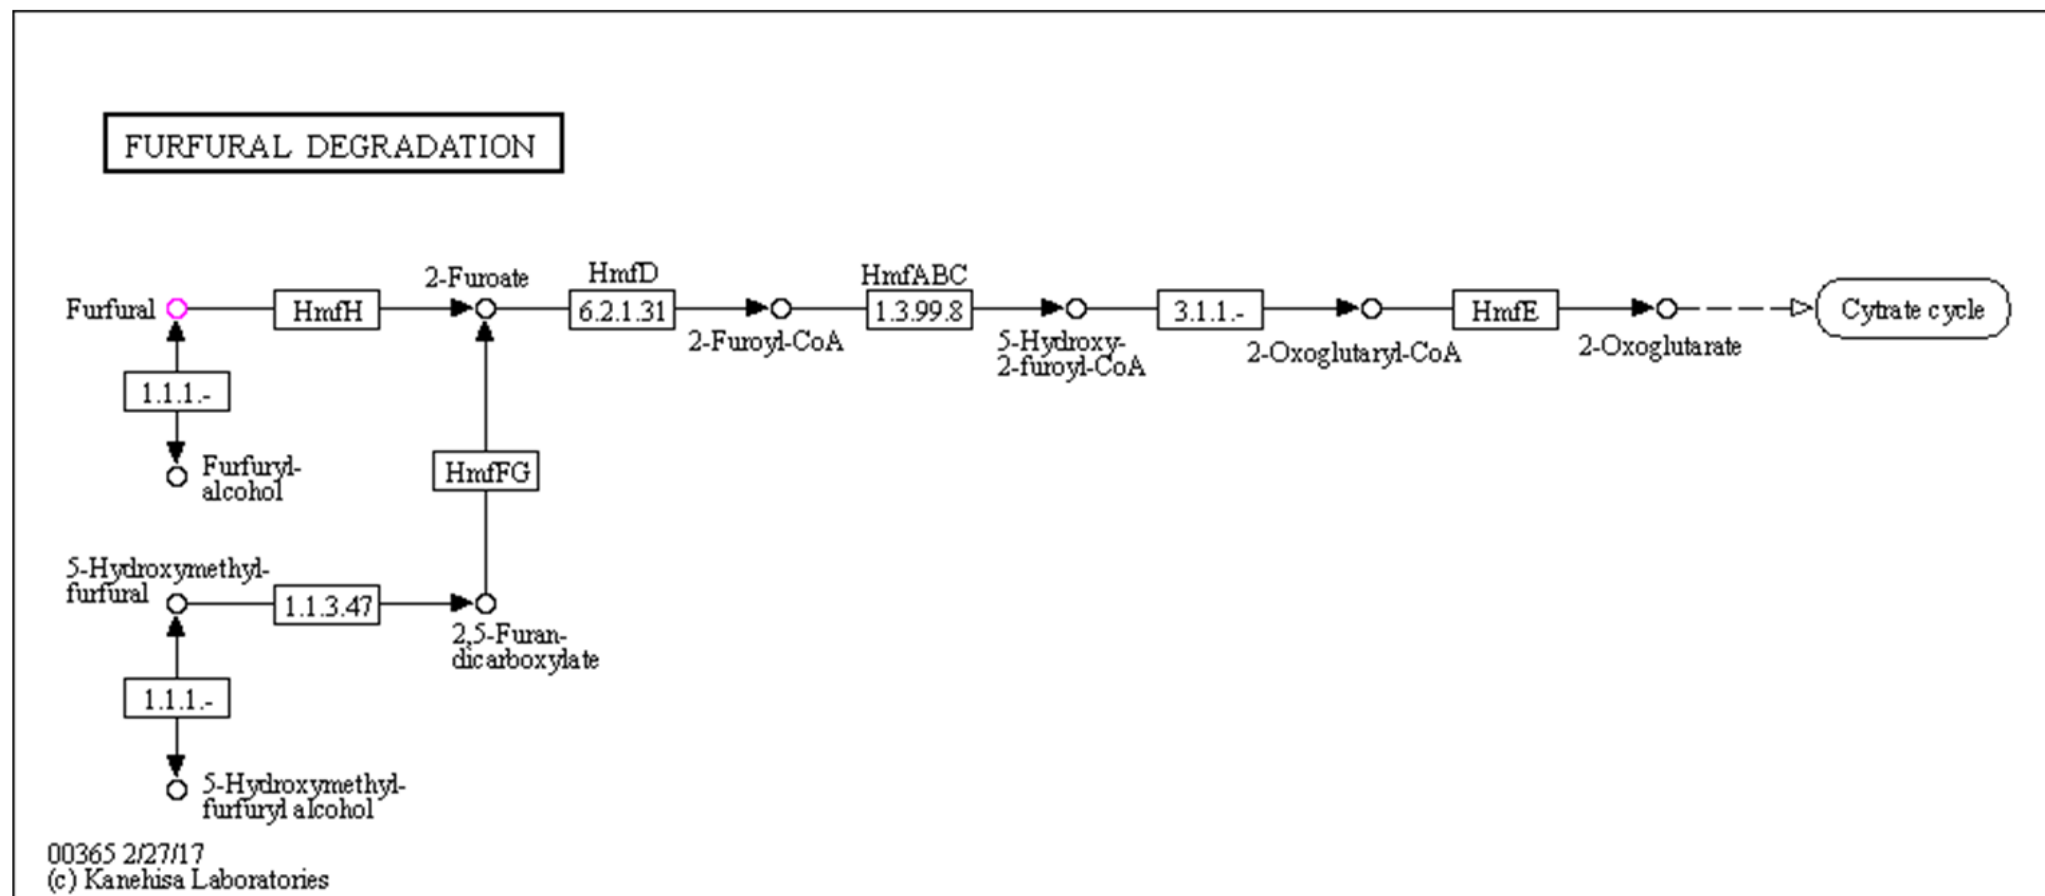

Figure S3. Furfural degradation.
